# Supplementary material
Source: PubMed Central journal article supplement (PMC3984580)
Supplement: NIHMS57417-supplement-01.pdf [file NIHMS57417-supplement-01.pdf]

**Figure S1.** Autophagic flux in melanoma cells at different pH conditions. SK-Mel-28 (A) and A375 (B) cells were cultured for 8 h at pH 7.4, 6.8 and 6.5 in the presence of BafA1 (40 nM) or CQ (30  $\mu$ M) and WB analysis of LC3 expression was performed. The WB shows that while CQ blocks degradation of LC3-II at pH 7.4 it does not maintain this activity at lower pH conditions. The quantification of LC3-II signal was normalized to ACTB by densitometric analysis.

**Figure S2.** Autophagy-inhibiting activity of CQ and HCQ. HCT116 (A) and HOS (B) cells were cultured in the presence of increasing concentrations of CQ and HCQ for 4 h and the autophagic flux was evaluated by WB. The data show that the inhibition of autophagy reached a plateau when 50  $\mu$ M of both compounds were used. Data are presented as means  $\pm$  standard deviations. Panels (C) and (D) show the lack of activity of CQ and HCQ as autophagy blockers in acidic conditions in HCT116 and HOS cells, respectively.

**Figure S3.** CTSB maturation at different pH conditions. (A) WB analysis of pro-CTSB and mature CTSB in HCT116 cells cultured at pH 7.4 and 6.8 in presence of BafA1 (50 nM), CQ (50  $\mu$ M) and a combination of BafA1 + CQ (as in Fig. 2B). (B) WB analysis of pro-CTSB and mature CTSB in HCT116 cells cultured at pH 7.4 and 6.8 in presence of BafA1 (50 nM), CQ (50  $\mu$ M) or Lys-01 (as in Fig. 3A).

**Figure S4.** Cell viability after repeated exposure to CQ and Lys-01. HCT116 and Me30966 cells were cultured at pH 7.4 or 6.8 and treated twice with CQ or Lys-01 with a 1-day interval. Cell viability was measured the day after the second exposure. Data are from 1 experiment run in triplicate wells.

**Table 1.** Influence of pH on intracellular CQ and Lys-01 concentration. HCT116 cells were exposed for 4 h to CQ (50  $\mu$ M) or Lys-01 (50  $\mu$ M) in medium buffered at pH 7.4 and 6.8. Whole cell lysate was subjected to HPLC analysis. Data are expressed as means  $\pm$  standard deviations.

|               | pH 7.4              | pH 6.8             |
|---------------|---------------------|--------------------|
| <b>CQ</b>     | 34 $\pm$ 6 $\mu$ M  | 5 $\pm$ 1 $\mu$ M  |
| <b>Lys-01</b> | 89 $\pm$ 15 $\mu$ M | 52 $\pm$ 4 $\mu$ M |

**Table S1.** IC<sub>50</sub> ( $\mu$ M) of CQ and Lys-01. HCT116, HCT116<sub>pH6.8</sub>, Me30966 and Me30966<sub>pH6.8</sub> cells were exposed for 48 h to CQ or Lys-01. Data are expressed as means  $\pm$  standard deviations.

|               | HCT116      | HCT116 <sub>pH6.8</sub> | Me30966    | Me30966 <sub>pH6.8</sub> |
|---------------|-------------|-------------------------|------------|--------------------------|
| <b>CQ</b>     | 37 $\pm$ 13 | >50                     | 27 $\pm$ 2 | >50                      |
| <b>Lys-01</b> | 8 $\pm$ 2   | 37 $\pm$ 7              | 6 $\pm$ 2  | 32 $\pm$ 7               |
